1  
2  
3  
4  
5  
6  
7  
8  
9  
10  
11  
12  
13  
14  
15  
16

**Genome-wide protein phylogenies for four African cichlid species**

Ajay Ramakrishnan Varadarajan, Rohini Mopuri, J. Todd Streebman, and Patrick T. McGrath<sup>1</sup>

<sup>1</sup>Department of Biological Sciences, Georgia Institute of Technology, Atlanta, GA 30332, USA

## 1 **ABSTRACT**

### 2 Background

3 The thousands of species of closely related cichlid fishes in the great lakes of East Africa are a  
4 powerful model for understanding speciation and the genetic basis of trait variation. Recently,  
5 the genomes of five species of African cichlids representing five distinct lineages were  
6 sequenced and used to predict protein products at a genome-wide level. Here we characterize  
7 the evolutionary relationship of each cichlid protein to previously sequenced animal species.

### 8 Results

9 We used the Treefam database, a set of preexisting protein phylogenies built using 109  
10 previously sequenced genomes, to identify Treefam families for each protein annotated from  
11 four cichlid species: *Metriaclima zebra*, *Astatotilapia burtoni*, *Pundamilia nyererei* and  
12 *Neolamporologus brichardi*. For each of these Treefam families, we built new protein  
13 phylogenies containing each of the cichlid protein hits. Using these new phylogenies we  
14 identified the evolutionary relationship of each cichlid protein to its nearest human and zebrafish  
15 protein. This data is available either through download or through a webserver we have  
16 implemented.

### 17 Conclusion

18 These phylogenies will be useful for any cichlid researchers trying to predict biological and  
19 protein function for a given cichlid gene, understanding the evolutionary history of a given cichlid  
20 gene, identifying recently duplicated cichlid genes, or performing genome-wide analysis in  
21 cichlids that relies on using databases generated from other species.

## 1 BACKGROUND

2 The rapid decrease in sequencing costs and the development of broadly applicable genetic  
3 tools like TALENs and CRISPR/Cas9 has facilitated the development of a large number of new  
4 species as model organisms ([Joung and Sander 2013](#), [Doudna and Charpentier 2014](#), [Hsu,](#)  
5 [Lander et al. 2014](#), [Nemudryi, Valetdinova et al. 2014](#)). For evolutionary biologists, this has  
6 been especially fruitful – species with unique evolutionary traits can now be used as model  
7 organisms to identify and understand the underlying genetic and cellular mechanisms  
8 responsible for trait changes ([Goldstein and King 2016](#)). For example, threespine sticklebacks  
9 have long fascinated evolutionary biologists for their coexisting phenotypically divergent forms  
10 including freshwater/anadromous pairs ([Hagen 1967](#), [Mcphail 1969](#), [McKinnon and Rundle](#)  
11 [2002](#)). Freshwater lakes created after the retreat of Pleistocene glaciers have been populated  
12 by marine sticklebacks, evolving repeated changes in a number of traits. These adaptations  
13 include morphological changes to body shape, pigmentation changes, salt handling, and  
14 reproductive related behaviors ([Bell and Foster 1994](#), [McKinnon and Rundle 2002](#)). A  
15 combination of quantitative genetics and resequencing of individuals isolated from freshwater  
16 and saltwater habitats identified a large number of loci putatively responsible for evolution of  
17 marine-freshwater ecotypes ([Colosimo, Peichel et al. 2004](#), [Chan, Marks et al. 2010](#), [Jones,](#)  
18 [Grabherr et al. 2012](#)). An important conclusion from this research, and a number of other  
19 individual examples ([Martin and Orgogozo 2013](#)), is that despite the large number of genes that  
20 control a trait, natural selection can act in predictable ways, isolating genetic changes in  
21 preferred genes in response to specific environmental shifts. An important goal now is to identify  
22 additional examples of repeated evolution, and understand why particular genes are repeatedly  
23 selected.

24 Cichlid fishes offer an attractive avenue for this type of research. Cichlids are well-known for  
25 their adaptive radiations in the Great Lakes of East Africa. The three largest radiations in Lakes  
26 Victoria, Lake Malawi, and Lake Tanganyika have generated between 250 – 500 species per  
27 lake in a period of time that ranges from 100,000 to 12 million years ([Kocher 2004](#), [Brawand,](#)  
28 [Wagner et al. 2014](#)). These radiations resulted in exceptional phenotypic diversity in behavior,  
29 neurodevelopment, body shape, sexual traits, and ecological specialization. However, due to  
30 the speed of evolution, nucleotide diversity between these species is on the order of nucleotide  
31 diversity within the human population ([Loh, Bezault et al. 2013](#), [Brawand, Wagner et al. 2014](#)).  
32 Further, genetic barriers have not formed in this short period, allowing for genetics -  
33 phenotypically-divergent species can still interbreed. These peculiarities of the cichlid family

1 make genomics and quantitative genetics approaches particularly attractive. Genes responsible  
2 for phenotypic diversity can be identified using quantitative mapping approaches in progeny of  
3 intercrossed species, association mapping in outbred animals, or tissue-specific transcriptomics  
4 in behaving animals. To facilitate these approaches, high-quality genomes for five cichlid fishes  
5 were generated ([Brawand, Wagner et al. 2014](#)). It is anticipated that genetic variants and genes  
6 responsible for a variety of interesting trait differences will be identified in the coming years.

7 Due to the difficulty of experimental study of cichlids in the laboratory, assignment of molecular  
8 and biological function to genes relies almost exclusively on homology to proteins characterized  
9 biochemically, or in model organisms such as *Caenorhabditis elegans*, *Drosophila*  
10 *melanogaster*, *Danio rerio*, or *Mus musculus*. Homologous proteins share a common  
11 evolutionary ancestry ([Fitch 1970](#)), suggesting shared biochemical and/or biological role,  
12 justifying the use of homology to assign function to genes identified in cichlid fish. Proteins with  
13 shared homology can be characterized as orthologs (which diverged from a common ancestor  
14 due to speciation) or paralogs (which diverged from a common ancestor due to a gene  
15 duplication event). In general, orthologs are expected to retain similar (if not identical) function  
16 with each other. Paralogs are expected to acquire novel function and/or biological roles. For  
17 cichlids, paralogs are thought to be especially relevant to their evolution - the cichlid lineage has  
18 undergone an increased rate of gene duplication, suggesting that these novel genes could  
19 serve important roles in the cichlid's adaptive radiations ([Lynch and Conery 2000](#), [Brawand,](#)  
20 [Wagner et al. 2014](#)). Cichlids also belong to the teleost infraclass of fish, whose ancestors have  
21 undergone a genome-wide duplication event resulting in the duplication of a large number of  
22 genes ([Taylor, Braasch et al. 2003](#)). Gene duplication can allow resolution of adaptive conflict  
23 by allowing a bifunctional ancestral gene to resolve into two specialized genes ([Lynch and Force](#)  
24 [2000](#)). These gene duplicates have been proposed to play a role in the evolutionary success of  
25 the teleost fish, which make up ~96% of all fish. Phylogenetic relationships could potentially be  
26 used to identify the cichlid genes that have undergone subfunctionalization. For all of these  
27 reasons, it would be helpful to place each cichlid protein into a phylogeny to aid in predicting the  
28 gene function for a given cichlid gene.

29 In this report, we utilized the TreeFam database of protein phylogenies to create protein  
30 phylogenies for all completely sequenced cichlid genomes. We analyzed these phylogenies to  
31 determine evolutionary relationships for each of these cichlid genes. This data is available for  
32 download or searching on a web server, and should be useful to any researchers studying  
33 cichlid fish.

## 1 METHODS

### 2 Overview

3 We employed a phylogeny-based approach to study the function and evolution of <genes of  
4 interest> taken from four East African cichlid species. Our aim was to assign each cichlid gene  
5 to a pre-defined gene family to identify homologous proteins and their evolutionary relationship.  
6 To accomplish this, we used TreeFam, a database of phylogenetic trees drawn from 109 animal  
7 genomes ([Li, Coghlan et al. 2006](#), [Ruan, Li et al. 2008](#), [Schreiber, Patricio et al. 2014](#)). A  
8 webserver implementing the Treefam pipeline is provided ([www.treefam.org](http://www.treefam.org)) to add new  
9 proteins of interest to existing TreeFam trees. We implemented this pipeline locally to perform  
10 this on a genomic basis.

### 11 Datasets and TreeFam analysis

12 Protein coding sequences and annotation files for four cichlid species, *A. burtoni*, *M. zebra*, *N.*  
13 *brichardi*, and *P. nyererei*, were obtained from the supplemental dataset from the genome  
14 sequencing paper ([Brawand, Wagner et al. 2014](#)). An improved genome for *M. zebra* was also  
15 recently published; protein coding sequence and genome annotation files from this paper were  
16 downloaded from NCBI ([Conte and Kocher 2015](#)). Annotation files were parsed using custom  
17 Python scripts and used to identify the longest protein isoform and amino acid sequence for  
18 each gene. This was done to limit the phylogeny to one representative protein isoform for each  
19 gene. To assign each of these proteins to a single TreeFam family, we utilized the  
20 `treefam.py` script provided as part of the TreeFam API ([Schreiber, Patricio et al. 2014](#)). This  
21 script uses the program HMMER to identify matches using hidden Markov model profiles  
22 generated for each of the TreeFam families ([Eddy 1998](#)). After this had run on all of the proteins,  
23 we collected all of the protein sequences that best matched a given TreeFam to add these to  
24 the preexisting phylogeny. Multiple sequence alignments and phylogenies for each TreeFam  
25 were retrieved from a locally cloned SQL database with API utilities provided by TreeFam. We  
26 used MAFFT (version 7.221) to add the new cichlid proteins to the retrieved multiple sequence  
27 alignment using the `-q`, `-s`, and `-x` options ([Kato, Misawa et al. 2002](#), [Kato](#)  
28 [and Standley 2013](#)). The aligned output was then used to add the new proteins to the retrieved  
29 phylogeny file using RAxML (version 8.1.15) using the GAMMA model for rate heterogeneity  
30 with the WAG substitution matrix ([Stamatakis, Ludwig et al. 2005](#), [Stamatakis 2006](#)).

### 31 Identification of closest relationships to human and zebrafish proteins

1 For each cichlid protein, we used custom Python scripts to identify the closest human and  
2 zebrafish protein using the phylogenetic tree produced by RAXML. The structures of each tree  
3 were analyzed using the ETE toolkit, which provides a Python framework for analysis and  
4 visualization of protein trees ([Huerta-Cepas, Serra et al. 2016](#)). Trees were rooted using a  
5 midpoint outgroup method implemented by the `MidpointOutgroup` function. To find the  
6 closest human protein and its evolutionary relationship with a cichlid protein of interest, the trees  
7 were then traversed to identify the smallest subtree containing the cichlid protein and one or  
8 more human protein. If such a subtree could not be found (i.e. there was no human protein in  
9 the phylogeny), the relationship was defined as `None`. If the subtree contained a single  
10 human protein and a single cichlid protein from the cichlid species, the relationship was defined  
11 as `1:1`. If the subtree contained a single human protein and exactly two cichlid proteins  
12 from the cichlid species, this relationship was defined as a `1:2` with the human protein.  
13 Finally, if the subtree contained multiple human proteins, or more than two cichlid proteins from  
14 the cichlid species, this relationship was defined as a `many:many`. The closest human protein was  
15 identified using the shortest branch length. To convert the Ensembl protein ID's of the human  
16 proteins to HGNC identifiers ([Gray, Yates et al. 2015](#)), we downloaded mapping data from  
17 Ensembl BioMart ([Aken, Ayling et al. 2016](#)). An essentially identical process was also performed  
18 between all cichlid proteins with zebrafish proteins. An excel spreadsheet (one per species) was  
19 then created for each cichlid gene for this information.

20 PDFs of the resulting phylogenies were rendered using the ETE toolkit. A full size version of  
21 each TreeFam phylogeny was created using all species. In addition, a smaller PDF was created  
22 from a pruned tree containing a limited number of well-characterized species (human (*H.*  
23 *sapiens*), mouse (*M. musculus*), zebrafish (*D. rerio*), fruit fly (*D. melanogaster*), and nematode  
24 (*C. elegans*)), the closely related Nile tilapia (*O. niloticus*), and the four new cichlid species.

## 25 RESULTS AND DISCUSSION

### 26 Identification of human and zebrafish relationships for each cichlid gene

27 The cichlids species of East Africa have become a popular genomic model to understand the  
28 evolution of a number of traits, including differences in morphology, coloration and behavior. To  
29 broaden our understanding of the function and evolutionary history of the genes that are  
30 encoded in the genomes of four recently-sequenced cichlid species, we performed phylogenetic  
31 analysis using the previously published TreeFam pipeline to add the new cichlid proteins to  
32 preexisting protein phylogenies generated from a large number of animal species (**Figure 1**).  
33 The most current version of the TreeFam database ([Schreiber, Patricio et al. 2014](#)), which

1 contains 15,736 phylogenetic trees generated from 109 animal genomes covering ~2.2 million  
2 sequences, can be used to study evolutionary relationships between homologous proteins.  
3 While this database already includes the African cichlid *O. niloticus* (Nile tilapia), it does not  
4 contain four recently sequenced African cichlids: *M. zebra* from Lake Malawi, *P. nyererei* from  
5 Lake Victoria, *N. brichardi* from Lake Tanganyika, and *A. burtoni* found in a variety of African  
6 lakes and rivers. For all four cichlid species, the majority of cichlid genes, 82.2% – 84.7%,  
7 contained a hit to a preexisting TreeFam family (**Figure 2**). Using the resulting phylogenies, we  
8 identified the closest human and zebrafish gene along with the evolutionary relationship to the  
9 cichlid. These included traditional evolutionary relationships (Ortholog and Paralog) and also a  
10 novel evolutionary definition we call HalfOrtholog, to account for the large number of cichlid  
11 genes that duplicated in the ancestral teleost lineage and are retained in the extant species.

## 12 **Data accessibility**

13 This data is intended as a resource for the cichlid community. We have provided access to this  
14 data in three ways. 1. Two PDF files for each TreeFam were generated for the purposes of  
15 human inspection. One PDF contains a phylogeny for a TreeFam from a limited number of  
16 species: humans, four well-characterized model organisms (*C. elegans*, *D. melanogaster*, *D.*  
17 *rerio*, and *M. musculus*), Nile tilapia (*O. niloticus*), and the four recently studied cichlid species.  
18 The second PDF contains a phylogeny of all 108 species used in the analysis. While the second  
19 phylogeny is the most complete, it is difficult to analyze due to the large number of species. This  
20 data is hosted on a web server (<http://cichlids.biosci.gatech.edu/>) and can be  
21 searched using cichlid gene names, TreeFam IDs, or human and zebrafish names. 2. Excel files  
22 for each cichlid species that contain each gene, its best hit to a human and zebra fish gene, and  
23 its evolutionary relationship to that gene. We anticipate this data will be useful for genomic scale  
24 analysis. For example, the excel file can be loaded into scripts to automatically map cichlid  
25 genes to human or zebrafish homologs. This could be useful for the purposes of pathway  
26 analysis (such as gene ontology), which often are limited to human genes. 3. Finally,  
27 phylogenies of each TreeFam are available for download in enhanced Newick tree format.  
28 These will be useful for any researchers interested in automated analysis of the phylogenies for  
29 the purpose of enhancing the evolutionary relationships that we have reported here. For  
30 example, researchers could use this dataset to identify genes whose protein phylogenies  
31 contradict the species phylogenies.

## 32 **Example phylogeny generated from a tree containing members of the TGF $\beta$ superfamily**

1 To illustrate these evolutionary relationships as well as common issues users should be aware  
2 of in using these trees, we have included two figures of new phylogenies generated in this  
3 analysis. **Figure 3** shows a subtree of TF351789, which includes members of the TGF $\beta$ -  
4 superfamily of proteins including BMP2 and BMP4. These proteins are ubiquitous throughout  
5 metazoans, and control proliferation and differentiation of cells throughout development  
6 ([Salazar, Gamer et al. 2016](#)). This tree includes both ortholog and paralog relationships. For  
7 example, the subtree indicated by **a** in **Figure 3** shows ortholog relationships between the  
8 cichlid proteins and human BMP4. These genes likely play similar biological roles in cichlids.  
9 Similarly, subtree **b** contains cichlid orthologs to human BMP2 (with the exception of *M. zebra*,  
10 which will be discussed below), suggesting these genes play similar biological roles as the  
11 orthologs play in other species. There is also a cichlid-specific set of paralogs to BMP2 and  
12 BMP4 not present in *D. rerio* (subtree **c**) suggesting that there was a duplication of BMP2 or  
13 BMP4 in a recent common ancestor of all cichlid species following separation from the zebrafish  
14 lineage. It is not obvious from the phylogeny what biological role these genes might play. This  
15 clade of genes is potentially of interest to cichlid biologists, as they could play a role in the  
16 extensive morphological diversity observed among cichlid species. However, analysis of the full  
17 tree indicated that this clade contains genes from a large number of additional teleost fish along  
18 with a coelacanth fish (*L. chalumnae*) and an anole lizard (*A. carolinensis*) (**Figure S1**). Further,  
19 blasting the protein sequence encoded by the ab.gene.s112.4 from *A. burtoni* to the *D. rerio*  
20 genome identified a match to a known protein annotated as BMP16 ([Feiner, Begemann et al.](#)  
21 [2009](#)). BMP16 does not appear to be present in the Treefam database, which explains why it  
22 was not present in the phylogeny. This set of BMP2/BMP4 paralogs thus seems to be a  
23 duplication that occurred in an ancient vertebrate ancestor of these fish (preceding the teleost  
24 ancestor) and lost in most tetrapod lineages as proposed by Marques et al ([Marques,](#)  
25 [Fernandez et al. 2016](#)).

26 We observed a similar issue in the phylogeny surrounding the human IRX1 gene (TF319371)  
27 (**Figure S2**). The Treefam phylogeny suggests that *D. rerio* contained a single ortholog to this  
28 gene while each of the cichlid species contained two copies of this gene. However, previous  
29 publications demonstrate that there are also two versions of IRX1 in *D. rerio* (called *irx1a* and  
30 *irx1b*) ([Dildrop and Ruther 2004](#), [Feijoo, Manzanares et al. 2004](#)). Inspection of the Treefam  
31 data indicates that *irx1a* isn't present in the starting dataset. These examples illustrate a  
32 common issue to most genomic analysis. Since Treefam relies on genomic-scale predictions,  
33 there are likely errors within the resulting phylogenies. Users would do well to manually verify or  
34 repeat any of these phylogenies for genes they are especially interested in.



1 We also were curious about the lack of a clear ortholog to BMP2 in *M. zebra* (**Figure 3**). It  
2 seemed unlikely that this species could lose this protein entirely due to its essential function in  
3 bone development. We were able to track down this discrepancy to an error in the annotation  
4 file for *M. zebra*. Through blastp, we were able to identify mz.gene.s5.238 as a gene containing  
5 a strong match to BMP2. mz.gene.s5.238, however, was assigned to the TF314677 family, and  
6 predicted to be an ortholog to the human protein FERMT1. When we investigated the protein  
7 sequence more closely, it became clear that mz.gene.s5.238 appeared to contain a fusion of  
8 two genes: an ortholog to BMP2 and an ortholog to FERMT1. Due to the longer length of  
9 FERMT1, mz.gene.s5.238 was assigned to the TreeFam containing FERMT1. This is unlikely to  
10 represent a real gene fusion, and the improved version of the *M. zebra* genome predicts  
11 separate gene products consistent with other species ([Conte and Kocher 2015](#)). We observed a  
12 similar potential error with the PTGFR prostaglandin receptor. An ortholog of PTGFR has  
13 recently been shown to control female reproductive behaviors in the cichlid *A. burtoni* ([Juntti,  
14 Hilliard et al. 2016](#)), however, the Treefam containing the human PTGFR gene (TF324982), did  
15 not contain an ortholog of this gene in *A. burtoni*. Again, this seems to be due to an error in  
16 annotation incorrectly predicting a fusion between two genes. The best blastp match  
17 ab.gene.s495.12 contains a fusion between two genes, an ortholog to PTGFR and an ortholog  
18 to the ZFYVE9. Due to the longer length of the ZFYVE9 protein, the ab.gene.s495.12 gene is  
19 assigned to the Treefam containing the human ZFYVE9. Again, this is unlikely to represent a  
20 real fusion, and it since has been corrected in new annotations. These two examples illustrate  
21 how errors in the gene annotation can lead to incorrect phylogenies.

## 22 **Example phylogeny generated from a tree containing arginine vasopressin receptors**

23 **Figure 4** shows a subtree of the phylogeny for TF106499, which contains a number of receptors  
24 for the arginine vasopressin and oxytocin neuropeptides that are thought to play a role in social  
25 behavior and sexual motivation ([Hammock, Lim et al. 2005](#), [Insel 2010](#)). We have limited this  
26 phylogeny to the clade containing the AVPR1A and AVPR1B human proteins. The clade  
27 indicated by **a** demonstrates the HalfOrtholog relationship (**Figure 4**). All of the sequenced  
28 cichlid species (along with zebrafish and other teleost fish) contain two genes that fall within this  
29 clade. This phylogeny suggests that the function of the ancestral AVPR1A gene bifurcated into  
30 two genes in an ancestor to the teleost lineage. While the phylogeny suggests that both of these  
31 receptors should retain a molecular role in arginine vasopressin/oxytocin signaling, the  
32 biological function of AVPR1A should not be assigned to either of the two genes in each cichlid  
33 species. Rather, experiment will be necessary to parse out the biological function of each of

1 these two half orthologs. A recent paper characterizing the expression pattern of these two  
2 receptors in zebrafish demonstrated that these two genes are expressed in similar but non-  
3 overlapping cell types([Iwasaki, Taguchi et al. 2013](#)). This phylogeny also contains the human  
4 AVPR1B protein. While mouse contains a clear ortholog to this gene, none of the cichlid species  
5 nor zebrafish contain an ortholog to this gene. Analysis of the full phylogeny suggests that  
6 AVPR1B was lost in the teleost fish completely. Thus, the phylogeny indicates that the biological  
7 functions assigned to AVPR1B through the study of mouse and other mammals should not be  
8 directly assigned to any of the cichlid homologs without experimental study.

## 9 **CONCLUSION**

10 This study reports a set of protein phylogenies generated for four recently sequenced African  
11 cichlids. We hope that these phylogenies will be useful for cichlid researchers for the purpose of  
12 inferring biological and molecular function of cichlid genes.

## 13 **ACKNOWLEDGEMENTS**

14 We thank members of the McGrath and Streelman labs for comments on this work. This work  
15 was supported by NIH grants R21AG050304, R01GM114170, and the Ellison Medical  
16 Foundation (to P.T.M.) and NIH grants 1R01GM101095 and 2R01DE019637 (to J.T.S.).

## 17 **FIGURE LEGENDS**

18 **Figure 1.** Pipeline for adding cichlid proteins to preexisting Treefam phylogenies.

19 **Figure 2.** Summary of the human evolutionary relationships found in each species. HalfOrtholog  
20 is a non-standard relationship indicating a gene potentially duplicated and retained in an ancient  
21 teleost ancestor.

22 **Figure 3.** Subtree from the TF351789 family from a limited number of cichlid species and well-  
23 studied model organisms. This family contains a number of BMP growth factors belonging to the  
24 transforming growth factor beta family. Letters indicate additional subtrees discussed in the text.

25 **Figure 4.** Subtree from the TF106499 family from a limited number of cichlid species and well-  
26 studied model organisms. This family contains a number of G-protein receptors for the arginine  
27 vasopressin and oxytocin nonapeptide hormones. Letters indicate additional subtrees discussed  
28 in the text.

29 **Figure S1.** Full tree for the TF351789 family from all 109 species included in the Treefam  
30 database. This family contains a number of BMP growth factors belonging to the transforming  
31 growth factor beta family.

1 **Figure S2.** Subtree from the TF319371 family from a limited number of cichlid species and well-  
2 studied model organisms. This family contains a number of Iroquois-family of homeodomain  
3 transcription factors involved in patterning and other development processes.

#### 4 REFERENCES

- 5 Aken, B. L., S. Ayling, D. Barrell, L. Clarke, V. Curwen, S. Fairley, J. Fernandez Banet, K. Billis,  
6 C. Garcia Giron, T. Hourlier, K. Howe, A. Kahari, F. Kokocinski, F. J. Martin, D. N. Murphy, R.  
7 Nag, M. Ruffier, M. Schuster, Y. A. Tang, J. H. Vogel, S. White, A. Zadissa, P. Flicek and S. M.  
8 Searle (2016). "The Ensembl gene annotation system." Database (Oxford) **2016**.  
9 Bell, M. A. and S. A. Foster (1994). The evolutionary biology of the threespine stickleback.  
10 Oxford ; New York, Oxford University Press.  
11 Brawand, D., C. E. Wagner, Y. I. Li, M. Malinsky, I. Keller, S. Fan, O. Simakov, A. Y. Ng, Z. W.  
12 Lim, E. Bezault, J. Turner-Maier, J. Johnson, R. Alcazar, H. J. Noh, P. Russell, B. Aken, J. Alföldi,  
13 C. Amemiya, N. Azzouzi, J. F. Baroiller, F. Barloy-Hubler, A. Berlin, R. Bloomquist, K. L.  
14 Carleton, M. A. Conte, H. D'Cotta, O. Eshel, L. Gaffney, F. Galibert, H. F. Gante, S. Gnerre, L.  
15 Greuter, R. Guyon, N. S. Haddad, W. Haerty, R. M. Harris, H. A. Hofmann, T. Hourlier, G.  
16 Hulata, D. B. Jaffe, M. Lara, A. P. Lee, I. MacCallum, S. Mwaiko, M. Nikaido, H. Nishihara, C.  
17 Ozouf-Costaz, D. J. Penman, D. Przybylski, M. Rakotomanga, S. C. Renn, F. J. Ribeiro, M. Ron,  
18 W. Salzburger, L. Sanchez-Pulido, M. E. Santos, S. Searle, T. Sharpe, R. Swofford, F. J. Tan, L.  
19 Williams, S. Young, S. Yin, N. Okada, T. D. Kocher, E. A. Miska, E. S. Lander, B. Venkatesh, R.  
20 D. Fernald, A. Meyer, C. P. Ponting, J. T. Streebman, K. Lindblad-Toh, O. Seehausen and F. Di  
21 Palma (2014). "The genomic substrate for adaptive radiation in African cichlid fish." Nature  
22 **513**(7518): 375-381.  
23 Chan, Y. F., M. E. Marks, F. C. Jones, G. Villarreal, Jr., M. D. Shapiro, S. D. Brady, A. M.  
24 Southwick, D. M. Absher, J. Grimwood, J. Schmutz, R. M. Myers, D. Petrov, B. Jonsson, D.  
25 Schluter, M. A. Bell and D. M. Kingsley (2010). "Adaptive evolution of pelvic reduction in  
26 sticklebacks by recurrent deletion of a Pitx1 enhancer." Science **327**(5963): 302-305.  
27 Colosimo, P. F., C. L. Peichel, K. Nereng, B. K. Blackman, M. D. Shapiro, D. Schluter and D. M.  
28 Kingsley (2004). "The genetic architecture of parallel armor plate reduction in threespine  
29 sticklebacks." PLoS Biol **2**(5): E109.  
30 Conte, M. A. and T. D. Kocher (2015). "An improved genome reference for the African  
31 cichlid, *Metriaclima zebra*." BMC Genomics **16**: 724.  
32 Dildrop, R. and U. Ruther (2004). "Organization of Iroquois genes in fish." Dev Genes Evol  
33 **214**(6): 267-276.  
34 Doudna, J. A. and E. Charpentier (2014). "Genome editing. The new frontier of genome  
35 engineering with CRISPR-Cas9." Science **346**(6213): 1258096.  
36 Eddy, S. R. (1998). "Profile hidden Markov models." Bioinformatics **14**(9): 755-763.  
37 Feijoo, C. G., M. Manzanares, E. de la Calle-Mustienes, J. L. Gomez-Skarmeta and M. L.  
38 Allende (2004). "The *Irx* gene family in zebrafish: genomic structure, evolution and initial  
39 characterization of *irx5b*." Dev Genes Evol **214**(6): 277-284.  
40 Feiner, N., G. Begemann, A. J. Renz, A. Meyer and S. Kuraku (2009). "The origin of *bmp16*, a  
41 novel *Bmp2/4* relative, retained in teleost fish genomes." BMC Evol Biol **9**: 277.  
42 Fitch, W. M. (1970). "Distinguishing homologous from analogous proteins." Syst Zool **19**(2):  
43 99-113.

- 1 Goldstein, B. and N. King (2016). "The Future of Cell Biology: Emerging Model Organisms."  
2 Trends Cell Biol **26**(11): 818-824.
- 3 Gray, K. A., B. Yates, R. L. Seal, M. W. Wright and E. A. Bruford (2015). "Genenames.org: the  
4 HGNC resources in 2015." Nucleic Acids Res **43**(Database issue): D1079-1085.
- 5 Hagen, D. W. (1967). "Isolating Mechanism in Threespine Sticklebacks (*Gasterosteus*)."  
6 Journal of the Fisheries Research Board of Canada **24**(8): 1637-&.
- 7 Hammock, E. A., M. M. Lim, H. P. Nair and L. J. Young (2005). "Association of vasopressin 1a  
8 receptor levels with a regulatory microsatellite and behavior." Genes Brain Behav **4**(5):  
9 289-301.
- 10 Hsu, P. D., E. S. Lander and F. Zhang (2014). "Development and applications of CRISPR-Cas9  
11 for genome engineering." Cell **157**(6): 1262-1278.
- 12 Huerta-Cepas, J., F. Serra and P. Bork (2016). "ETE 3: Reconstruction, Analysis, and  
13 Visualization of Phylogenomic Data." Mol Biol Evol **33**(6): 1635-1638.
- 14 Insel, T. R. (2010). "The challenge of translation in social neuroscience: a review of  
15 oxytocin, vasopressin, and affiliative behavior." Neuron **65**(6): 768-779.
- 16 Iwasaki, K., M. Taguchi, J. L. Bonkowski and J. Y. Kuwada (2013). "Expression of arginine  
17 vasotocin receptors in the developing zebrafish CNS." Gene Expr Patterns **13**(8): 335-342.
- 18 Jones, F. C., M. G. Grabherr, Y. F. Chan, P. Russell, E. Mauceli, J. Johnson, R. Swofford, M.  
19 Pirun, M. C. Zody, S. White, E. Birney, S. Searle, J. Schmutz, J. Grimwood, M. C. Dickson, R. M.  
20 Myers, C. T. Miller, B. R. Summers, A. K. Knecht, S. D. Brady, H. Zhang, A. A. Pollen, T. Howes,  
21 C. Amemiya, P. Broad Institute Genome Sequencing, T. Whole Genome Assembly, J. Baldwin,  
22 T. Bloom, D. B. Jaffe, R. Nicol, J. Wilkinson, E. S. Lander, F. Di Palma, K. Lindblad-Toh and D.  
23 M. Kingsley (2012). "The genomic basis of adaptive evolution in threespine sticklebacks."  
24 Nature **484**(7392): 55-61.
- 25 Joung, J. K. and J. D. Sander (2013). "TALENs: a widely applicable technology for targeted  
26 genome editing." Nat Rev Mol Cell Biol **14**(1): 49-55.
- 27 Juntti, S. A., A. T. Hilliard, K. R. Kent, A. Kumar, A. Nguyen, M. A. Jimenez, J. L. Loveland, P.  
28 Mourrain and R. D. Fernald (2016). "A Neural Basis for Control of Cichlid Female  
29 Reproductive Behavior by Prostaglandin F2alpha." Curr Biol **26**(7): 943-949.
- 30 Katoh, K., K. Misawa, K. Kuma and T. Miyata (2002). "MAFFT: a novel method for rapid  
31 multiple sequence alignment based on fast Fourier transform." Nucleic Acids Res **30**(14):  
32 3059-3066.
- 33 Katoh, K. and D. M. Standley (2013). "MAFFT multiple sequence alignment software version  
34 7: improvements in performance and usability." Mol Biol Evol **30**(4): 772-780.
- 35 Kocher, T. D. (2004). "Adaptive evolution and explosive speciation: the cichlid fish model."  
36 Nat Rev Genet **5**(4): 288-298.
- 37 Li, H., A. Coghlan, J. Ruan, L. J. Coin, J. K. Heriche, L. Osmotherly, R. Li, T. Liu, Z. Zhang, L.  
38 Bolund, G. K. Wong, W. Zheng, P. Dehal, J. Wang and R. Durbin (2006). "TreeFam: a curated  
39 database of phylogenetic trees of animal gene families." Nucleic Acids Res **34**(Database  
40 issue): D572-580.
- 41 Loh, Y. H., E. Bezault, F. M. Muenzel, R. B. Roberts, R. Swofford, M. Barluenga, C. E. Kidd, A. E.  
42 Howe, F. Di Palma, K. Lindblad-Toh, J. Hey, O. Seehausen, W. Salzburger, T. D. Kocher and J.  
43 T. Streebman (2013). "Origins of shared genetic variation in African cichlids." Mol Biol Evol  
44 **30**(4): 906-917.
- 45 Lynch, M. and J. S. Conery (2000). "The evolutionary fate and consequences of duplicate  
46 genes." Science **290**(5494): 1151-1155.

- 1 Lynch, M. and A. Force (2000). "The probability of duplicate gene preservation by  
2 subfunctionalization." *Genetics* **154**(1): 459-473.
- 3 Marques, C. L., I. Fernandez, M. N. Viegas, C. J. Cox, P. Martel, J. Rosa, M. L. Cancela and V.  
4 Laize (2016). "Comparative analysis of zebrafish bone morphogenetic proteins 2, 4 and 16:  
5 molecular and evolutionary perspectives." *Cell Mol Life Sci* **73**(4): 841-857.
- 6 Martin, A. and V. Orgogozo (2013). "The Loci of repeated evolution: a catalog of genetic  
7 hotspots of phenotypic variation." *Evolution* **67**(5): 1235-1250.
- 8 McKinnon, J. S. and H. D. Rundle (2002). "Speciation in nature: the threespine stickleback  
9 model systems." *Trends in Ecology & Evolution* **17**(10): 480-488.
- 10 Mcphail, J. D. (1969). "Predation and Evolution of a Stickleback (*Gasterosteus*)." *Journal of*  
11 *the Fisheries Research Board of Canada* **26**(12): 3183-&.
- 12 Nemudryi, A. A., K. R. Valetdinova, S. P. Medvedev and S. M. Zakian (2014). "TALEN and  
13 CRISPR/Cas Genome Editing Systems: Tools of Discovery." *Acta Naturae* **6**(3): 19-40.
- 14 Ruan, J., H. Li, Z. Chen, A. Coghlan, L. J. Coin, Y. Guo, J. K. Heriche, Y. Hu, K. Kristiansen, R. Li,  
15 T. Liu, A. Moses, J. Qin, S. Vang, A. J. Vilella, A. Ureta-Vidal, L. Bolund, J. Wang and R. Durbin  
16 (2008). "TreeFam: 2008 Update." *Nucleic Acids Res* **36**(Database issue): D735-740.
- 17 Salazar, V. S., L. W. Gamer and V. Rosen (2016). "BMP signalling in skeletal development,  
18 disease and repair." *Nat Rev Endocrinol* **12**(4): 203-221.
- 19 Schreiber, F., M. Patricio, M. Muffato, M. Pignatelli and A. Bateman (2014). "TreeFam v9: a  
20 new website, more species and orthology-on-the-fly." *Nucleic Acids Res* **42**(Database  
21 issue): D922-925.
- 22 Stamatakis, A. (2006). "RAxML-VI-HPC: maximum likelihood-based phylogenetic analyses  
23 with thousands of taxa and mixed models." *Bioinformatics* **22**(21): 2688-2690.
- 24 Stamatakis, A., T. Ludwig and H. Meier (2005). "RAxML-III: a fast program for maximum  
25 likelihood-based inference of large phylogenetic trees." *Bioinformatics* **21**(4): 456-463.
- 26 Taylor, J. S., I. Braasch, T. Frickey, A. Meyer and Y. Van de Peer (2003). "Genome duplication,  
27 a trait shared by 22000 species of ray-finned fish." *Genome Res* **13**(3): 382-390.
- 28

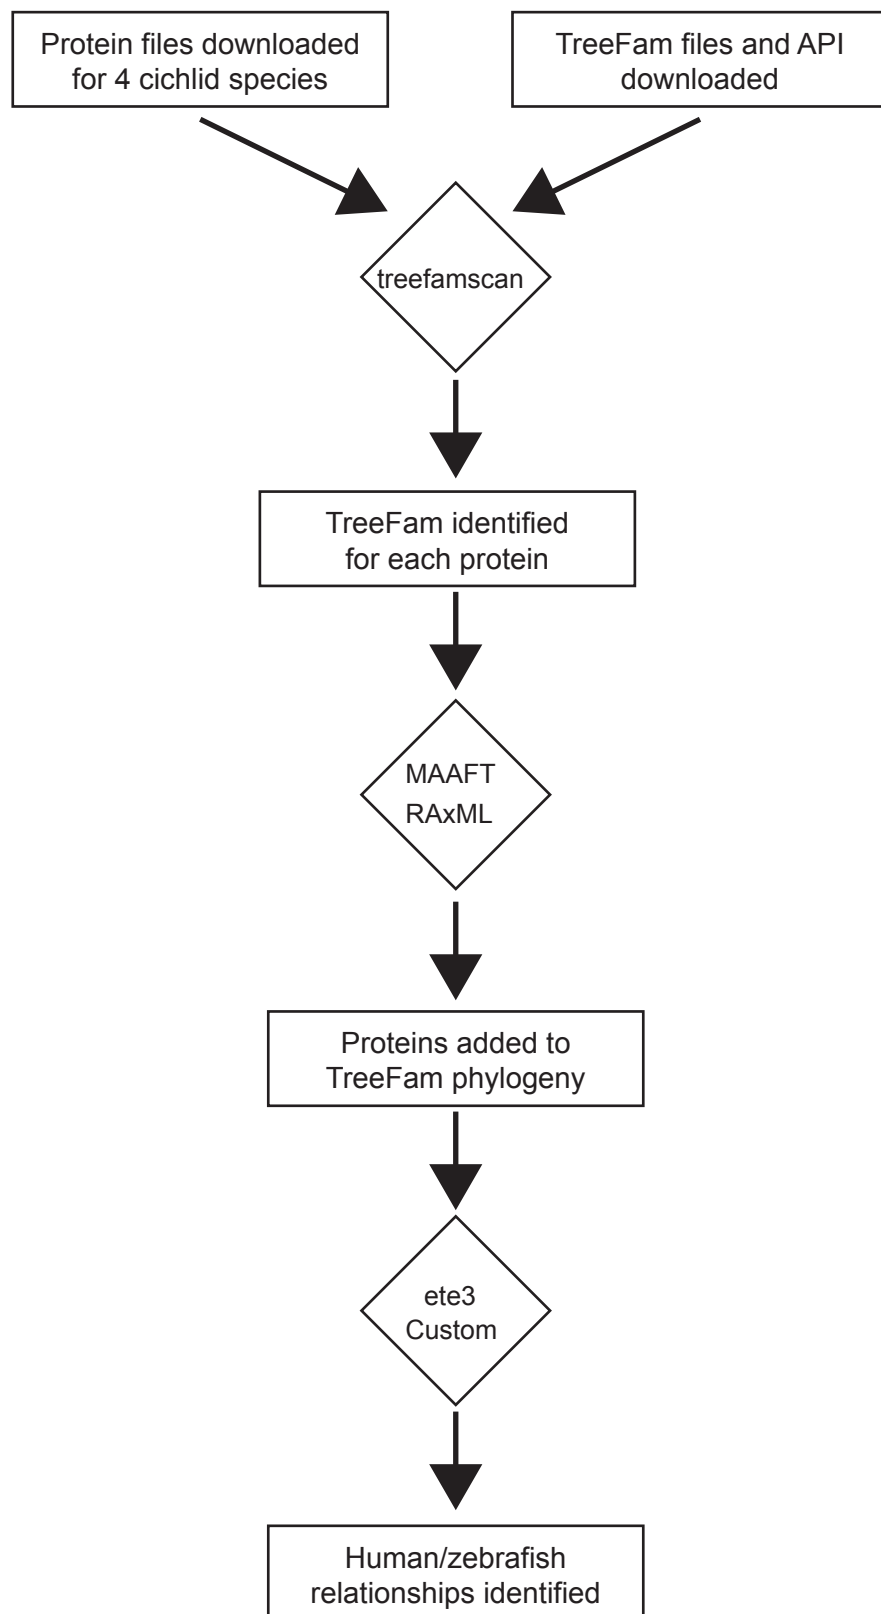

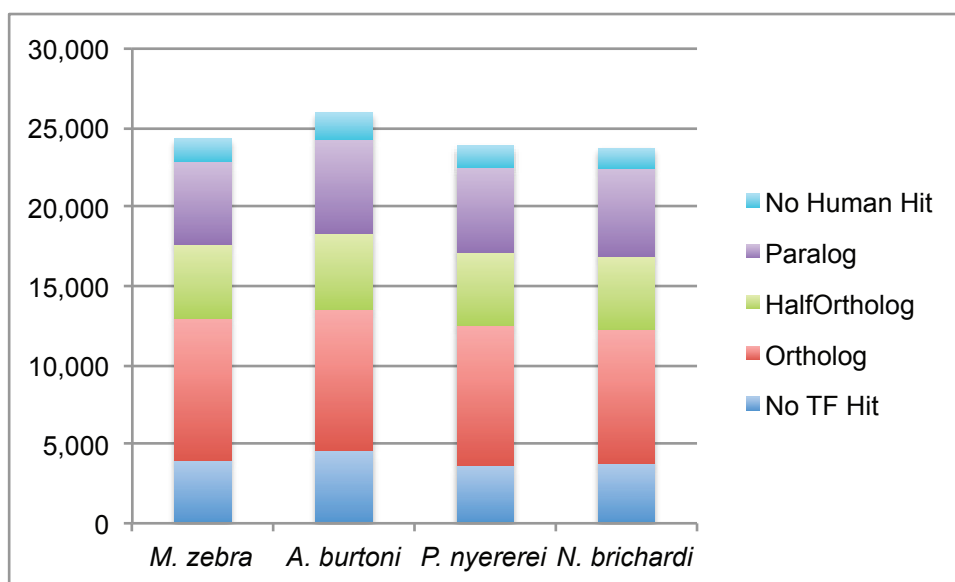

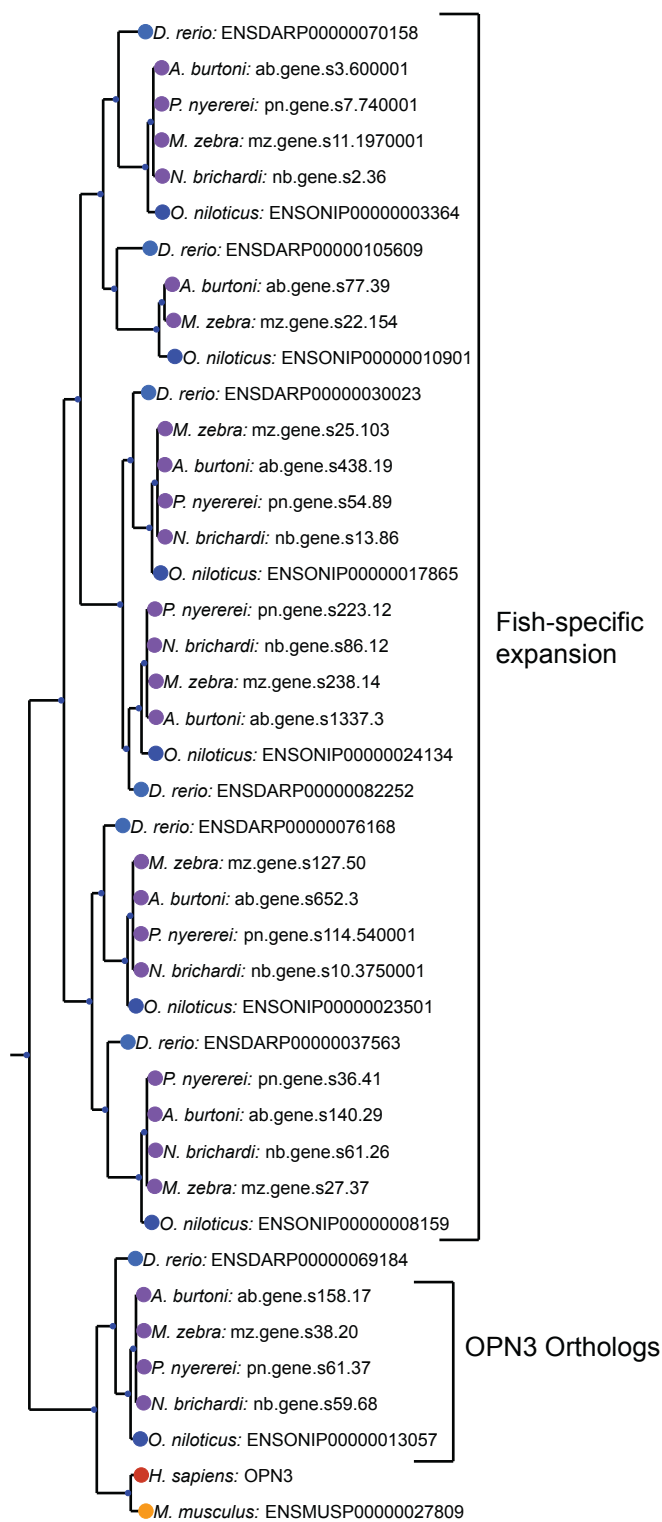



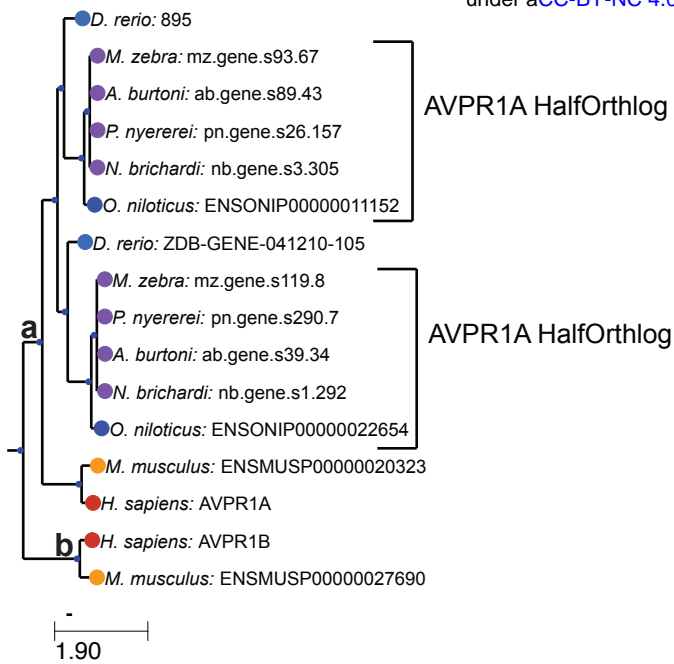

Source: https://www.biorxiv.org/content/10.1101/110510v1.full.pdf
